# Supplementary material
Source: PubMed Central journal article supplement (PMC7394732)
Supplement: NIHMS1587520-supplement-1587520_Supp_Tab1.pdf [file NIHMS1587520-supplement-1587520_Supp_Tab1.pdf]

Intrinsic physiological properties of central and edge TRN neurons

| Somatosensory TRN                           |                                         |                      |           |                                         |                      |           |
|---------------------------------------------|-----------------------------------------|----------------------|-----------|-----------------------------------------|----------------------|-----------|
|                                             | Burst Mode (-84 mV pre-stimulus $V_m$ ) |                      |           | Tonic Mode (-74 mV pre-stimulus $V_m$ ) |                      |           |
|                                             | Central Cells                           | Edge Cells           | P values  | Central Cells                           | Edge Cells           | P values  |
| Resting potential (mV)                      | -83 ± 0.3<br>(157)                      | -85 ± 0.4<br>(101)   | <0.0001   | n/a                                     | n/a                  | n/a       |
| Input resistance (MΩ)                       | 157 ± 7.1<br>(42)                       | 316 ± 40.5<br>(31)   | <0.0001   | 278 ± 24.3<br>(33)                      | 495 ± 59.5<br>(32)   | <0.001    |
| Membrane time constant (ms)                 | 10.4 ± 0.34<br>(42)                     | 13.3 ± 0.76<br>(31)  | <0.0005   | 17.5 ± 1.16<br>(33)                     | 20.5 ± 1.22<br>(32)  | 0.08      |
| Input capacitance (pF)                      | 70 ± 2.8<br>(42)                        | 51 ± 3.2<br>(31)     | <0.0001   | 67 ± 2.6<br>(33)                        | 49 ± 2.8<br>(32)     | <0.0001   |
| Rheobase (pA)                               | 61 ± 4.5<br>(25)                        | 39 ± 4.1<br>(28)     | <0.0005   | 24 ± 3.3<br>(26)                        | 16 ± 2.4<br>(28)     | <0.05     |
| AP threshold (mV)                           | -58 ± 0.7<br>(25)                       | -56 ± 0.8<br>(28)    | <0.05     | -56 ± 0.7<br>(26)                       | -55 ± 0.7<br>(28)    | 0.4       |
| AP amplitude (mV)                           | 69 ± 1.6<br>(22)                        | 72 ± 1.7<br>(23)     | 0.2       | 68 ± 1.5<br>(24)                        | 69 ± 1.8<br>(28)     | 0.4       |
| AP maximum rate of rise (mV/ms)             | 488 ± 17.8<br>(22)                      | 481 ± 18.6<br>(23)   | 0.8       | 459 ± 16.4<br>(24)                      | 434 ± 17.1<br>(28)   | 0.3       |
| AP maximum rate of fall (mV/ms)             | -400 ± 17.4<br>(22)                     | -336 ± 15.4<br>(23)  | <0.01     | -384 ± 14.1<br>(24)                     | -307 ± 15.8<br>(28)  | <0.0005   |
| AP half-width (ms)                          | 0.22 ± 0.005<br>(22)                    | 0.27 ± 0.010<br>(23) | <0.0005   | 0.23 ± 0.005<br>(24)                    | 0.29 ± 0.013<br>(28) | <0.0001   |
| Fast afterhyperpolarization (fast AHP) (mV) | -14.5 ± 0.71<br>(22)                    | -16.1 ± 0.82<br>(22) | 0.2       | -17.7 ± 0.78<br>(23)                    | -19.5 ± 0.72<br>(23) | 0.09      |
| Afterdepolarization (ADP) (mV)              | <i>na</i>                               | <i>na</i>            | <i>na</i> | -10.8 ± 0.64<br>(22)                    | -13.9 ± 0.80<br>(21) | <0.005    |
| Slow afterhyperpolarization (slow AHP) (mV) | -18.2 ± 0.64<br>(22)                    | -20.1 ± 0.82<br>(22) | 0.08      | -12.9 ± 0.67<br>(20)                    | -17.4 ± 0.72<br>(21) | <0.0001   |
| Offset burst # APs                          | 9.6 ± 0.85<br>(34)                      | 2.3 ± 0.51<br>(38)   | <0.0001   | <i>na</i>                               | <i>na</i>            | <i>na</i> |
| Offset burst peak frequency (Hz)            | 364 ± 23.8<br>(34)                      | 108 ± 23.2<br>(38)   | <0.0001   | <i>na</i>                               | <i>na</i>            | <i>na</i> |
| Offset burst mean frequency (Hz)            | 243 ± 15.4<br>(34)                      | 87 ± 18.6<br>(38)    | <0.0001   | <i>na</i>                               | <i>na</i>            | <i>na</i> |
| Spike frequency adaptation (Last/First)     | 0.13 ± 0.01<br>(31)                     | 0.23 ± 0.02<br>(42)  | <0.0001   | 0.32 ± 0.02<br>(29)                     | 0.47 ± 0.02<br>(40)  | <0.0001   |

Intrinsic physiological properties of central and edge TRN neurons

| Visual TRN                       |                                         |                         |         |                                         |            |           |
|----------------------------------|-----------------------------------------|-------------------------|---------|-----------------------------------------|------------|-----------|
|                                  | Burst Mode (-84 mV pre-stimulus $V_m$ ) |                         |         | Tonic Mode (-74 mV pre-stimulus $V_m$ ) |            |           |
|                                  | Central Cells                           | Edge Cells              | P value | Central Cells                           | Edge Cells | P value   |
| Resting potential (mV)           | $-84 \pm 0.3$<br>(21)                   | $-85 \pm 0.4$<br>(42)   | 0.47    | <i>na</i>                               | <i>na</i>  | <i>na</i> |
| Input resistance (M $\Omega$ )   | $173 \pm 23.3$<br>(14)                  | $296 \pm 26.8$<br>(31)  | <0.01   | <i>na</i>                               | <i>na</i>  | <i>na</i> |
| Membrane time constant (ms)      | $10.9 \pm 0.75$<br>(14)                 | $12.4 \pm 0.53$<br>(31) | 0.12    | <i>na</i>                               | <i>na</i>  | <i>na</i> |
| Input capacitance (pF)           | $70 \pm 4.3$<br>(14)                    | $51 \pm 5.7$<br>(31)    | <0.05   | <i>na</i>                               | <i>na</i>  | <i>na</i> |
| Offset burst # APs               | $5.8 \pm 0.76$<br>(19)                  | $0.9 \pm 0.27$<br>(33)  | <0.0001 | <i>na</i>                               | <i>na</i>  | <i>na</i> |
| Offset burst peak frequency (Hz) | $207 \pm 23.1$<br>(19)                  | $32 \pm 11.3$<br>(33)   | <0.0001 | <i>na</i>                               | <i>na</i>  | <i>na</i> |
| Offset burst mean frequency (Hz) | $107 \pm 8.0$<br>(19)                   | $25 \pm 13.7$<br>(33)   | <0.0001 | <i>na</i>                               | <i>na</i>  | <i>na</i> |
